# Supplementary material for: Bio-Guided Isolation of Acetogenins from Annona cherimola Deciduous Leaves: Production of Nanocarriers to Boost the Bioavailability Properties
Source: PubMed Central journal article supplement (PMC7587976; doi:10.3390/molecules25204861), 2020-10-21

Supporting information

# **Bio-guided Isolation of Acetogenins from *Annona cherimola* deciduous leaves: Production of Nanocarriers to Boost the Bioavailability Properties.**

**M. Teresa Gutiérrez<sup>1†</sup>, Alexandra G. Durán<sup>1†</sup>, Francisco J. R. Mejías<sup>1</sup>, José M.G. Molinillo<sup>1</sup>, Diego Megias<sup>2</sup>, Manuel M. Valdivia<sup>3</sup> and Francisco A. Macías<sup>1\*</sup>**

<sup>1</sup> Allelopathy Group, Department of Organic Chemistry, Institute of Biomolecules (INBIO), Campus de Excelencia Internacional (ceiA3), School of Science, University of Cadiz, 11510 Puerto Real, Cadiz, Spain; mariateresa.gutierrezva@alum.uca.es (M.T.G.); alexandra.garcia@uca.es (A.G.D.); javi.rodriguezmejias@uca.es (F.J.R.M.); chema.gonzalez@uca.es (J.M.G.M.); famacias@gm.uca.es (F.A.M.)

<sup>2</sup> Confocal Microscopy Unit, Spanish National Cancer Research Center (CNIO), Madrid, E-28029, Spain; dmegias@cnio.es (D.M.)

<sup>3</sup> Department of Biomedicine, Biotechnology and Public Health, School of Science, Institute of Biomolecules (INBIO), University of Cadiz, 11510 Puerto Real, Cádiz, Spain; manuel.valdivia@uca.es (M.M.V.)

\* Correspondence: famacias@gm.uca.es. Telephone: +34-956-012770

<sup>†</sup>These authors contributed equally to this work

## Index

|                                                                                                                                                                                                                                                                                                                                       |       |
|---------------------------------------------------------------------------------------------------------------------------------------------------------------------------------------------------------------------------------------------------------------------------------------------------------------------------------------|-------|
| <b>Physical data</b> .....                                                                                                                                                                                                                                                                                                            | S3    |
| <b><sup>1</sup>H and <sup>13</sup>C spectra</b> .....                                                                                                                                                                                                                                                                                 | S4–S8 |
| <b>Figure S1.</b> Cell viability by dye exclusion against ovarian carcinoma cells (IGROV-1) for the first (A), second (B) and third (C) fractionations of <i>A. cherimola</i> deciduous leaves. Extracts were evaluated at 100 ppm for 24 h. Experiments were performed in triplicate and data are expressed as mean ± SD, n = 3..... | S9    |
| <b>Figure S2.</b> D <sub>2</sub> O <sup>1</sup> H NMR comparison between α-CD, α-CD/urea polyrotaxane, SMPMs-ACGs and SMPMs-ACGs with phenol, from bottom to top.....                                                                                                                                                                 | S10   |
| <b>Figure S3.</b> ROESYAD 2D experiments.....                                                                                                                                                                                                                                                                                         | S11   |
| <b>Figure S4.</b> SMPMs wall thickness size distribution.....                                                                                                                                                                                                                                                                         | S12   |
| <b>Figure S5.</b> SMPMs size distribution.....                                                                                                                                                                                                                                                                                        | S13   |
| <b>Figure S6.</b> PM3 model of the SMPM shell in the case of two units of α-CD and thirty-two molecules of urea. (A) Biased geometry, with a distance of 26.46 Å between cyclodextrin molecules. (B) Truncated cone geometry, with a distance of 17.47 Å between cyclodextrin molecules (hydrogens are not represented).....          | S14   |
| <b>Figure S7.</b> Calibration curve for annonacin in CHCl <sub>3</sub> .....                                                                                                                                                                                                                                                          | S15   |
| <b>Figure S8.</b> Critical micellar concentration experiment                                                                                                                                                                                                                                                                          | S16   |
| <b>Figure S9.</b> XRD experiment of (A) α-cyclodextrin and (B) SMPMs-ACGs                                                                                                                                                                                                                                                             | S17   |

**Physical data**
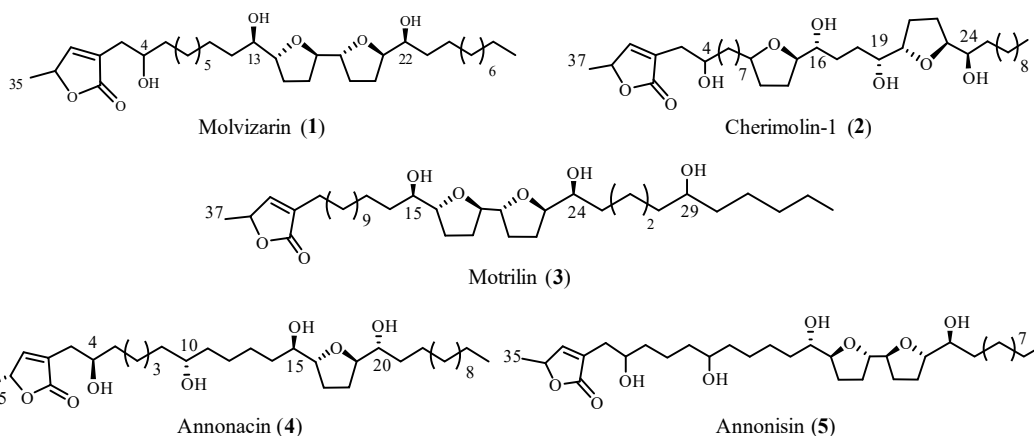

*Molvizarin* (1). This compound was obtained as a colourless oil in 0.001% yield; HRMS (ESI) calcd for  $C_{35}H_{61}O_7$  [M-H]<sup>-</sup>: 593.4417, found: 593.4460.

*Cherimolin-1* (2). This compound was obtained as a colourless oil in 0.0002% yield; HRMS (ESI) calcd for  $C_{37}H_{65}O_8$  [M-H]<sup>-</sup>: 637.4679, found: 637.4723.

*Motrilin* (3). This compound was obtained as a colourless oil in 0.0002% yield; HRMS (ESI) calcd for  $C_{37}H_{65}O_7$  [M-H]<sup>-</sup>: 621.4679, found: 621.4717.

*Annonacin* (4). This compound was obtained as a yellow oil in 0.003% yield; HRMS (ESI) calcd for  $C_{35}H_{64}O_7$  [M+H]<sup>+</sup>: 597.4736, found: 597.4730.

*Annonisin* (5). This compound was obtained as a colourless oil in 0.001% yield; HRMS (ESI) calcd for  $C_{36}H_{63}O_{10}$  [M+HCOO]<sup>-</sup>: 655.4421, found: 655.4424.

**<sup>1</sup>H-NMR and <sup>13</sup>C-NMR Spectroscopy of ACGs 1–5 (<sup>1</sup>H NMR 600 MHz, <sup>13</sup>C NMR 150 MHz, CDCl<sub>3</sub>)**

*Molvizarin (1)*

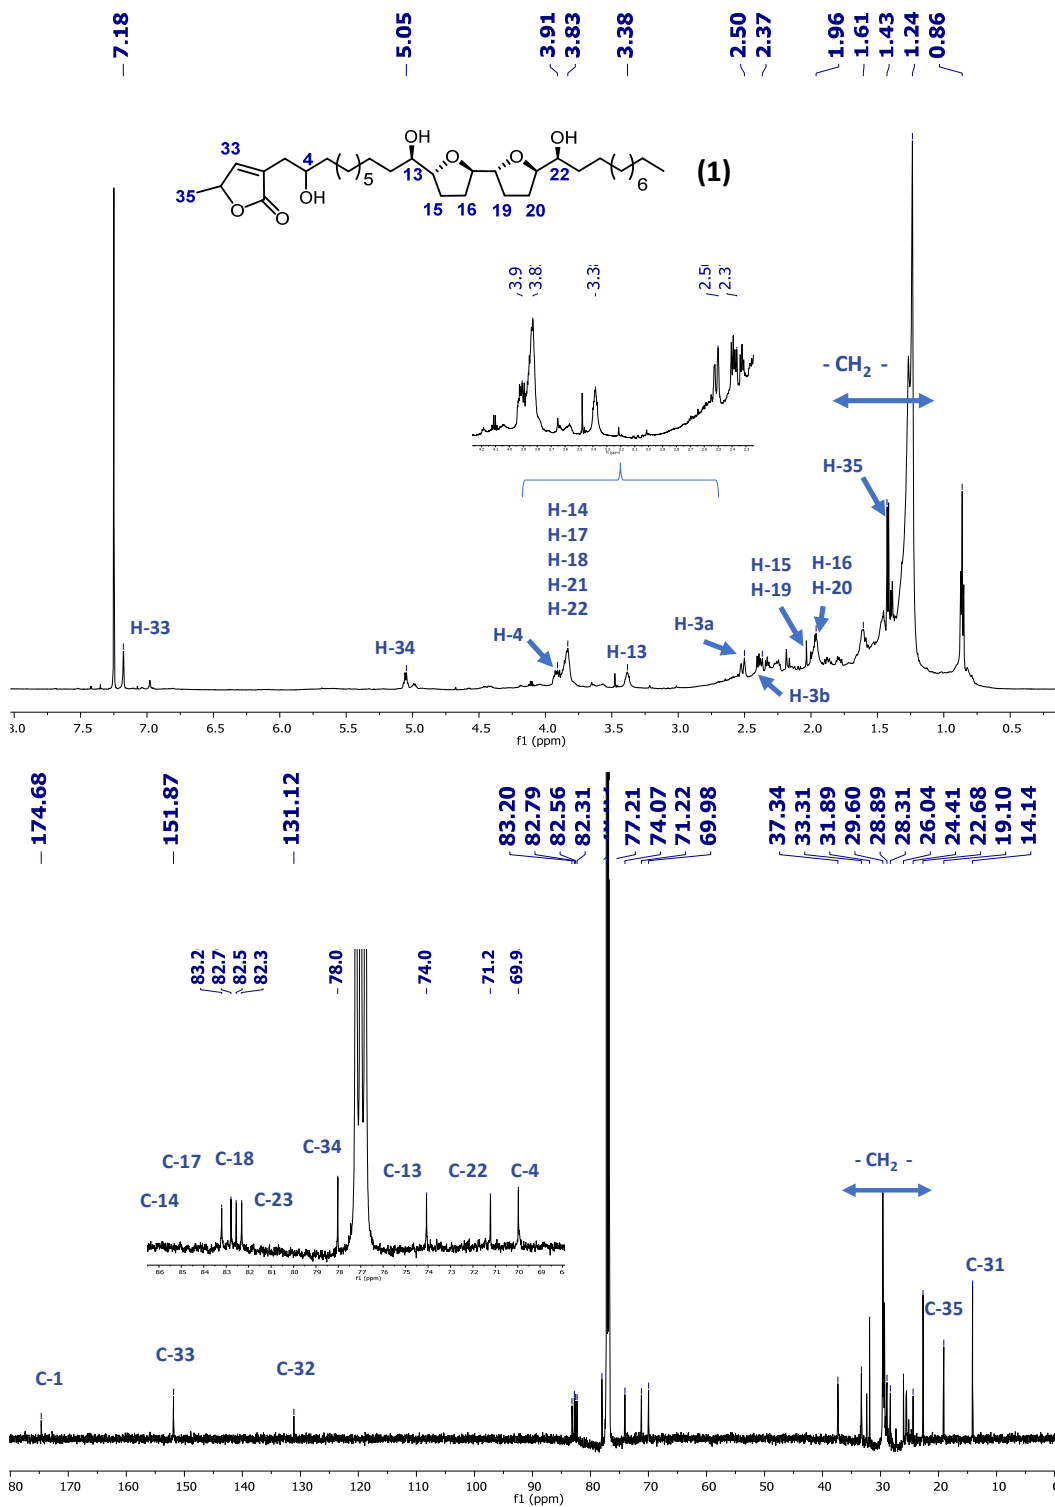

**Cherimolin-1 (2)**
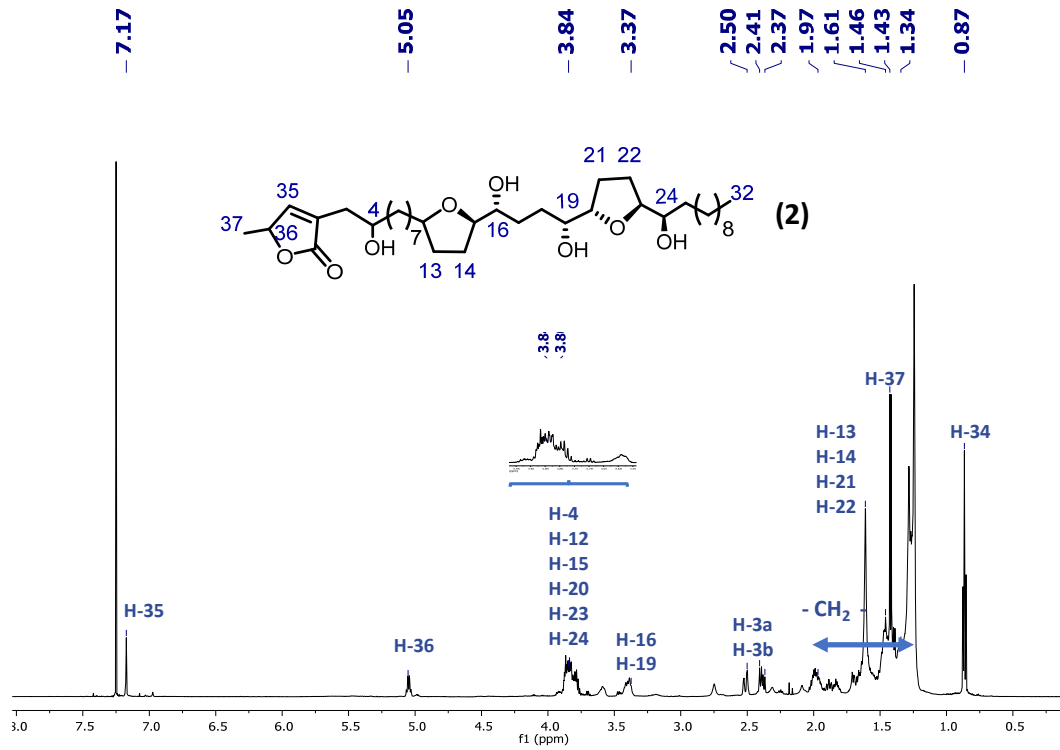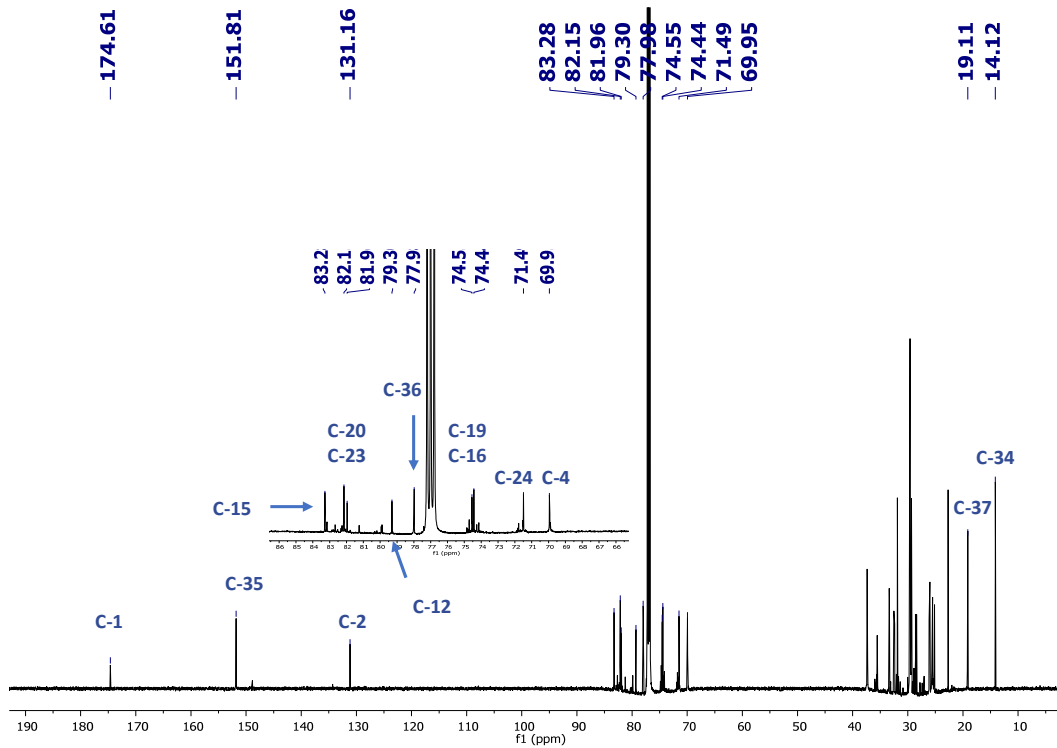

Motrilin (3)

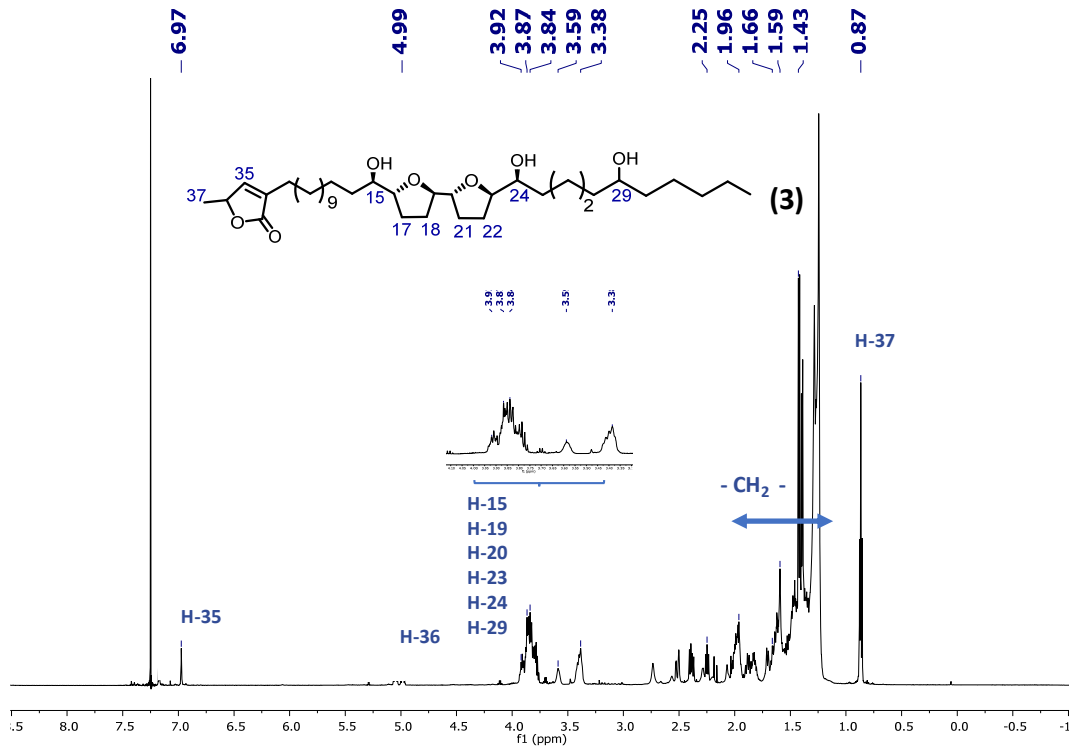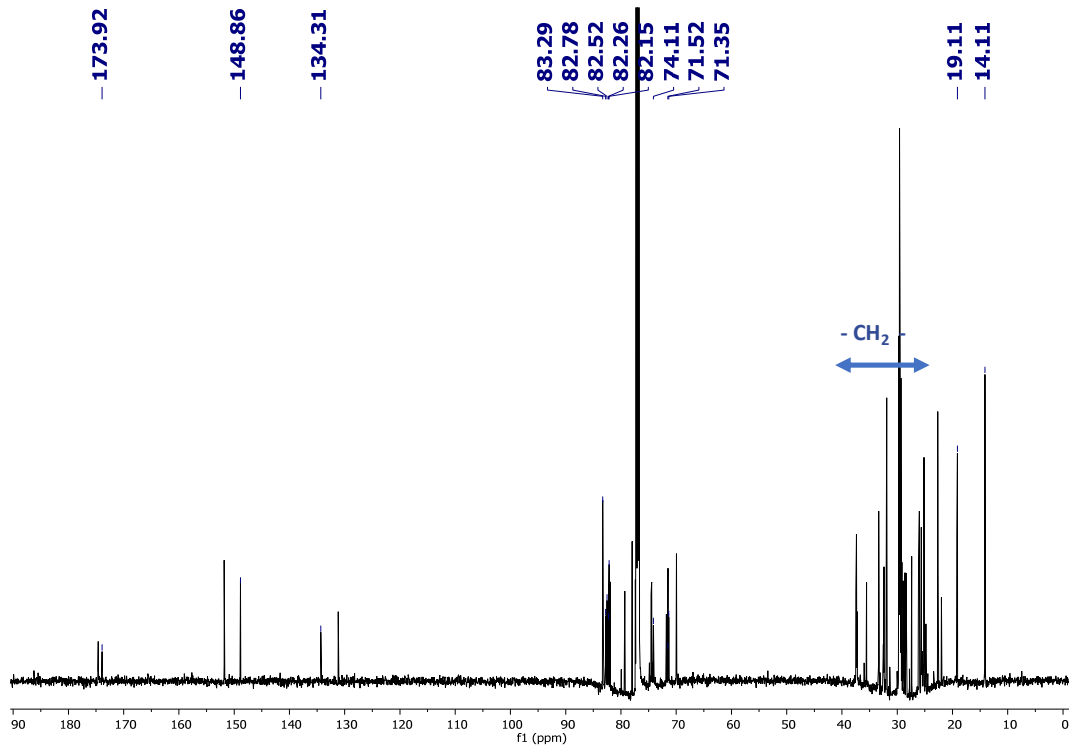

Annonacin (4)

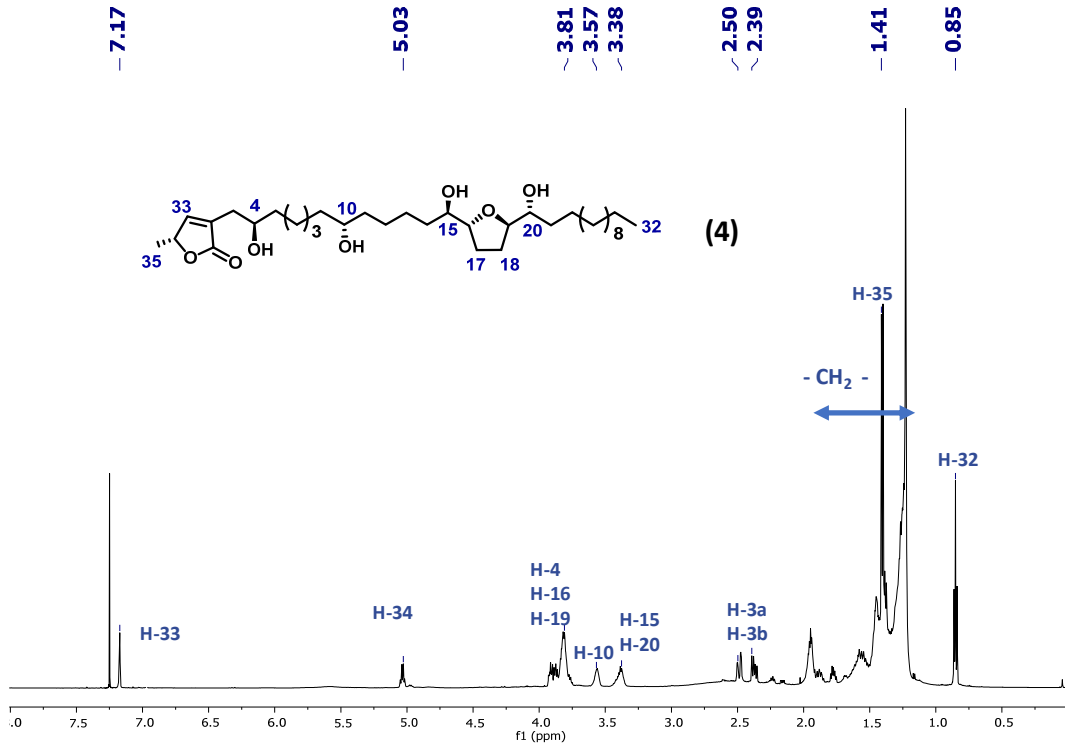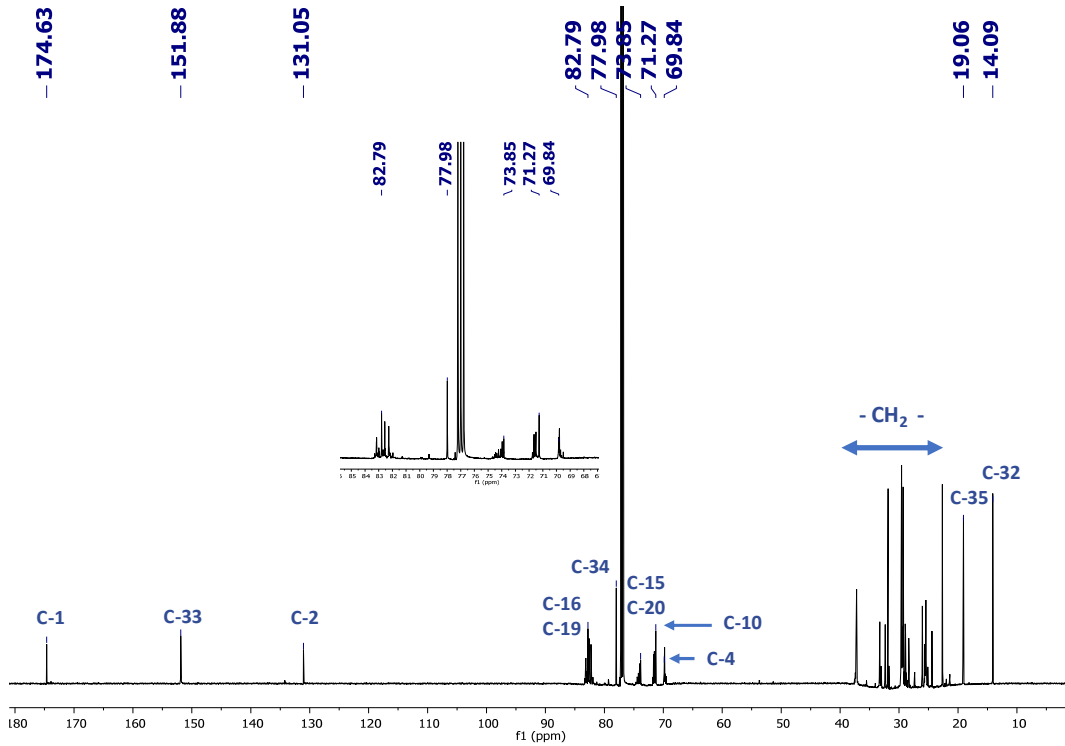

Annonisin (5)

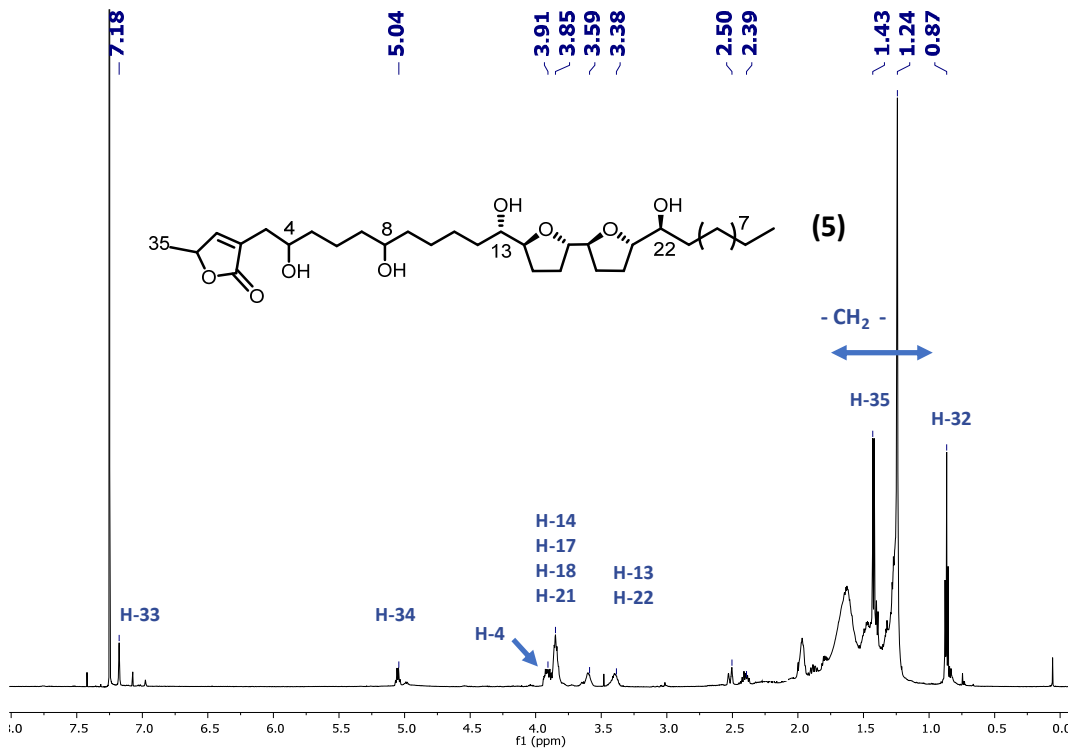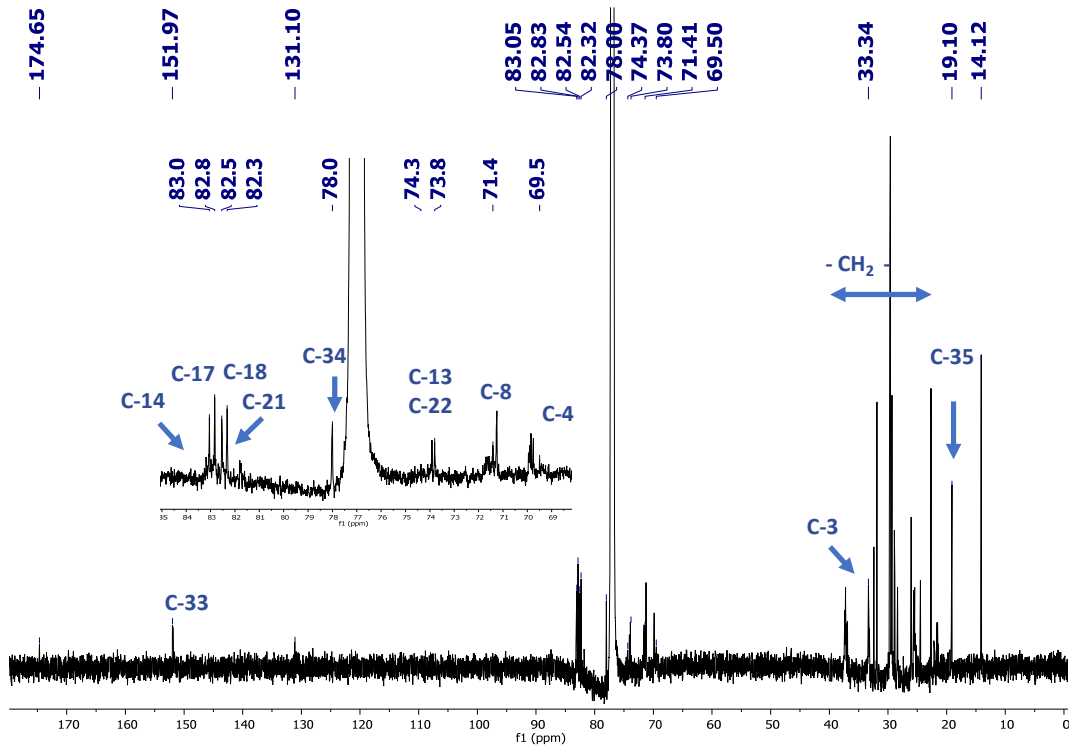



**Figure S1.** Cell viability by dye exclusion against ovarian carcinoma cells (IGROV-1) for the first (A), second (B) and third (C) fractionations of *A. cherimola* deciduous leaves. Extracts were evaluated at 100 ppm for 24 h. Experiments were performed in triplicate and data are expressed as mean  $\pm$  SD,  $n = 3$ , \*  $p < 0.05$  vs untreated cells (DMSO 0.1%).

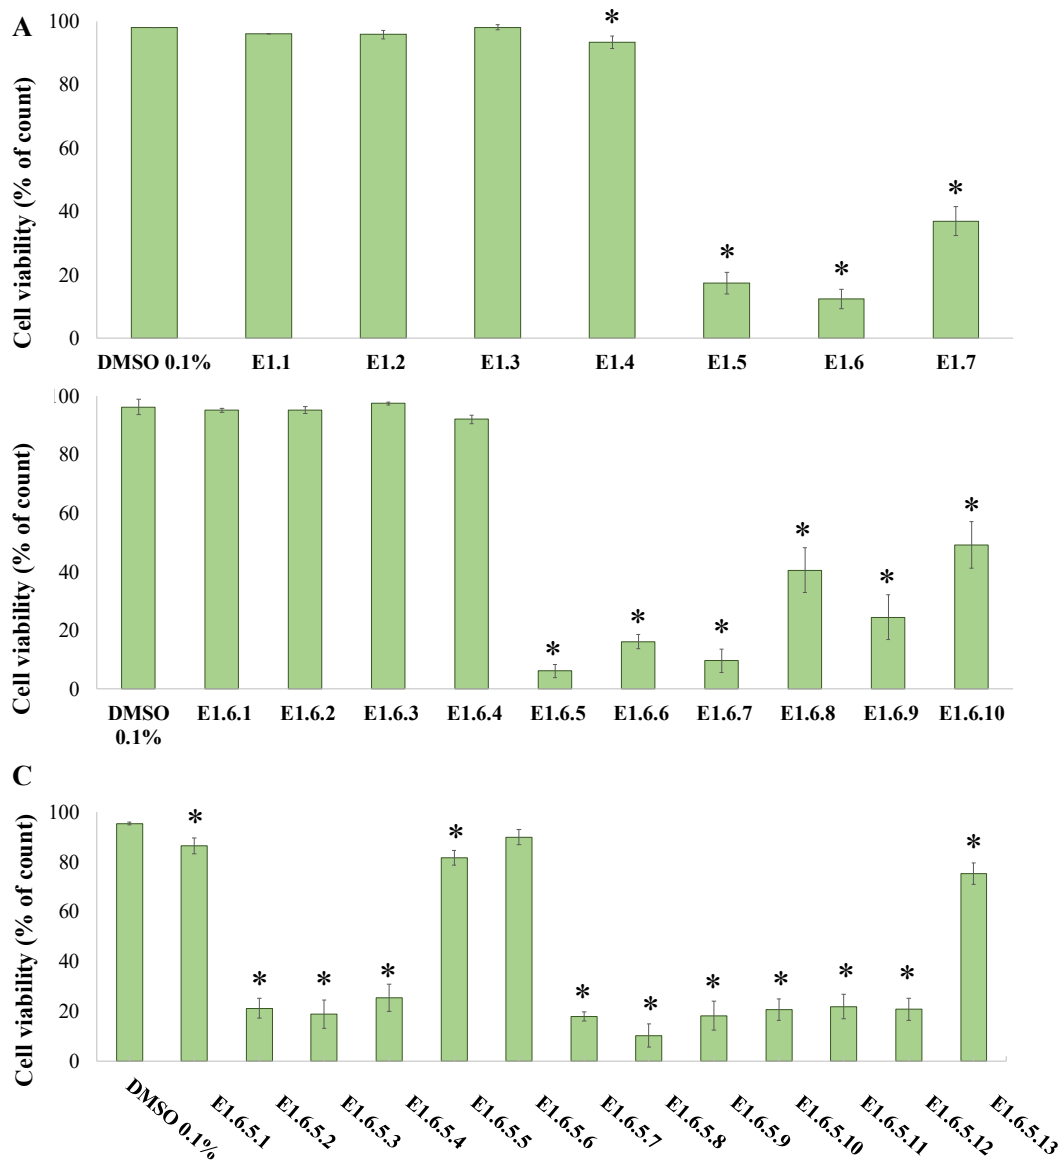

**Figure S2.** D<sub>2</sub>O <sup>1</sup>H NMR comparison between α-CD, α-CD/urea polyrotaxane, SMPMs-ACGs and SMPMs-ACGs with phenol, from bottom to top.

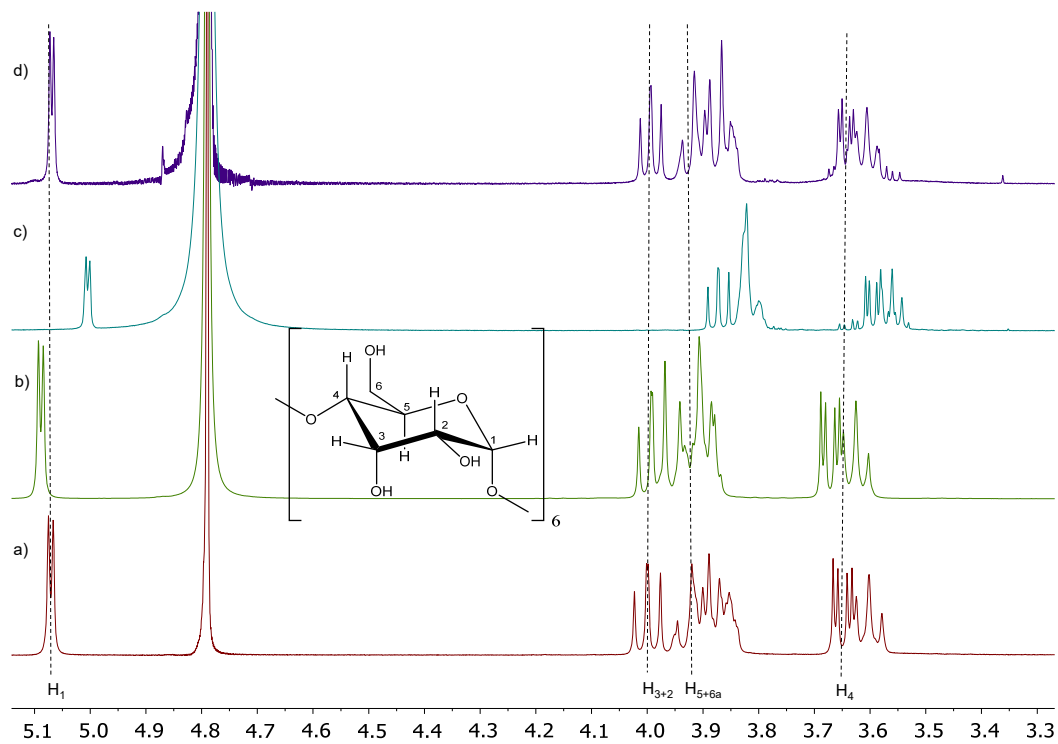

**Figure S3.** (Top)  $^1\text{H-NMR}$  of SMPMs-ACGs/ $\alpha$ -CD at different ppm to differentiate alpha-cyclodextrin signals and annonacin signals. (Bottom) ROESYAD 2D experiment of SMPMs-ACGs/ $\alpha$ -CD.

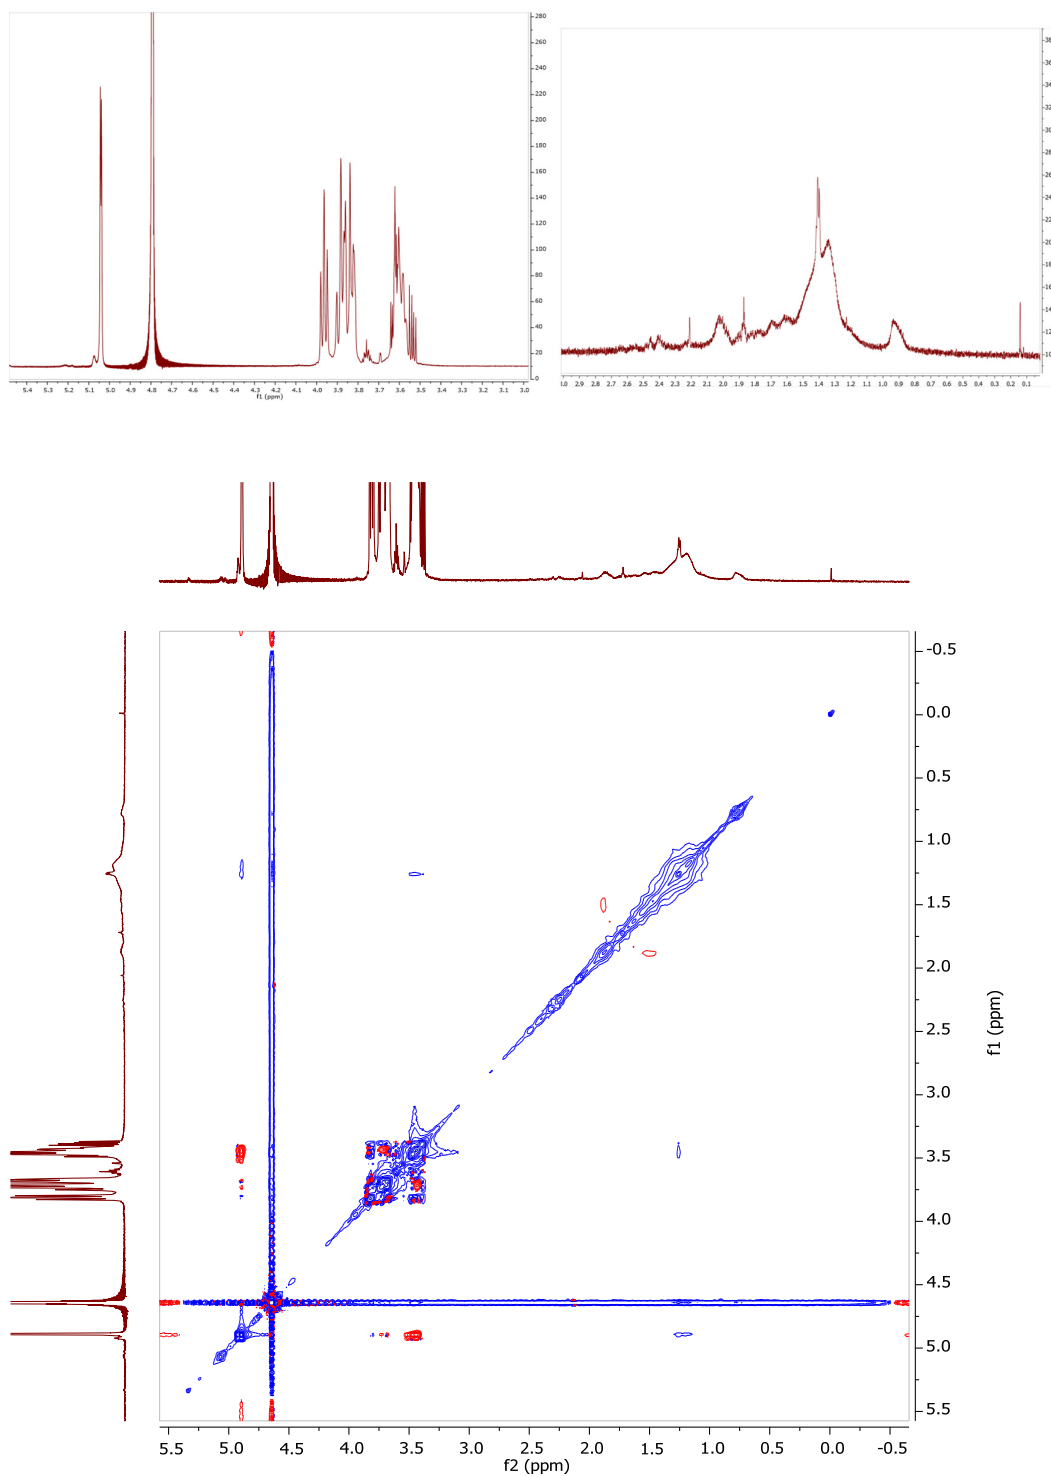

**Figure S4.** SMPMs wall thickness size distribution that are associated with  $\alpha$ -CD/urea, with a mean size of 96.02 nm.

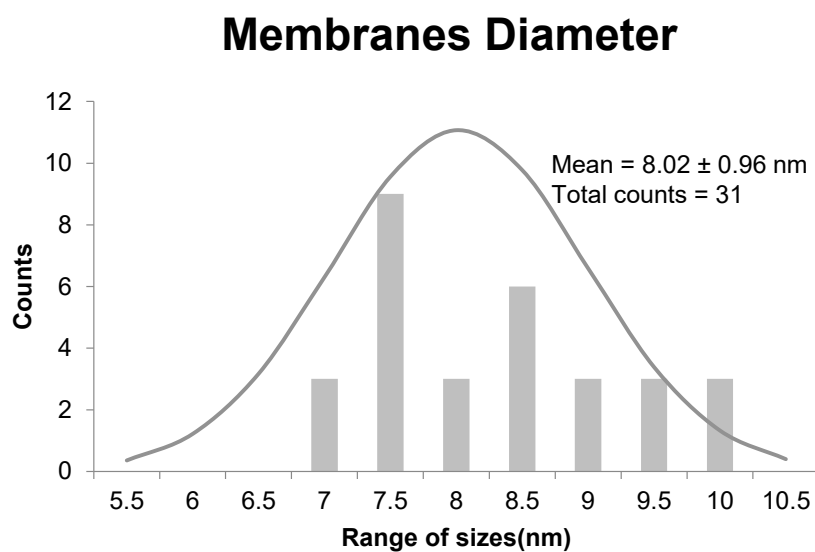

**Figure S5.** SMPMs size distribution that are associated with  $\alpha$ -CD/urea, with a mean size of 96.02 nm. Two normal distributions can be observed at 60 and 140 nm of mean.

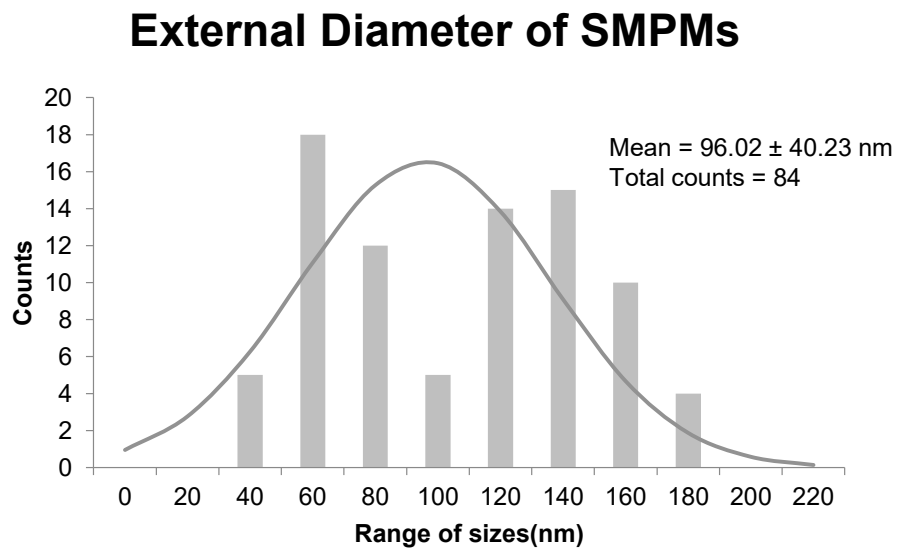

**Figure S6.** PM3 model of the SMPM shell in the case of two units of  $\alpha$ -CD and thirty-two molecules of urea. (A) Biased geometry, with a distance of 26.46 Å between cyclodextrin molecules. (B) Truncated cone geometry, with a distance of 17.47 Å between cyclodextrin molecules (hydrogens are not represented).

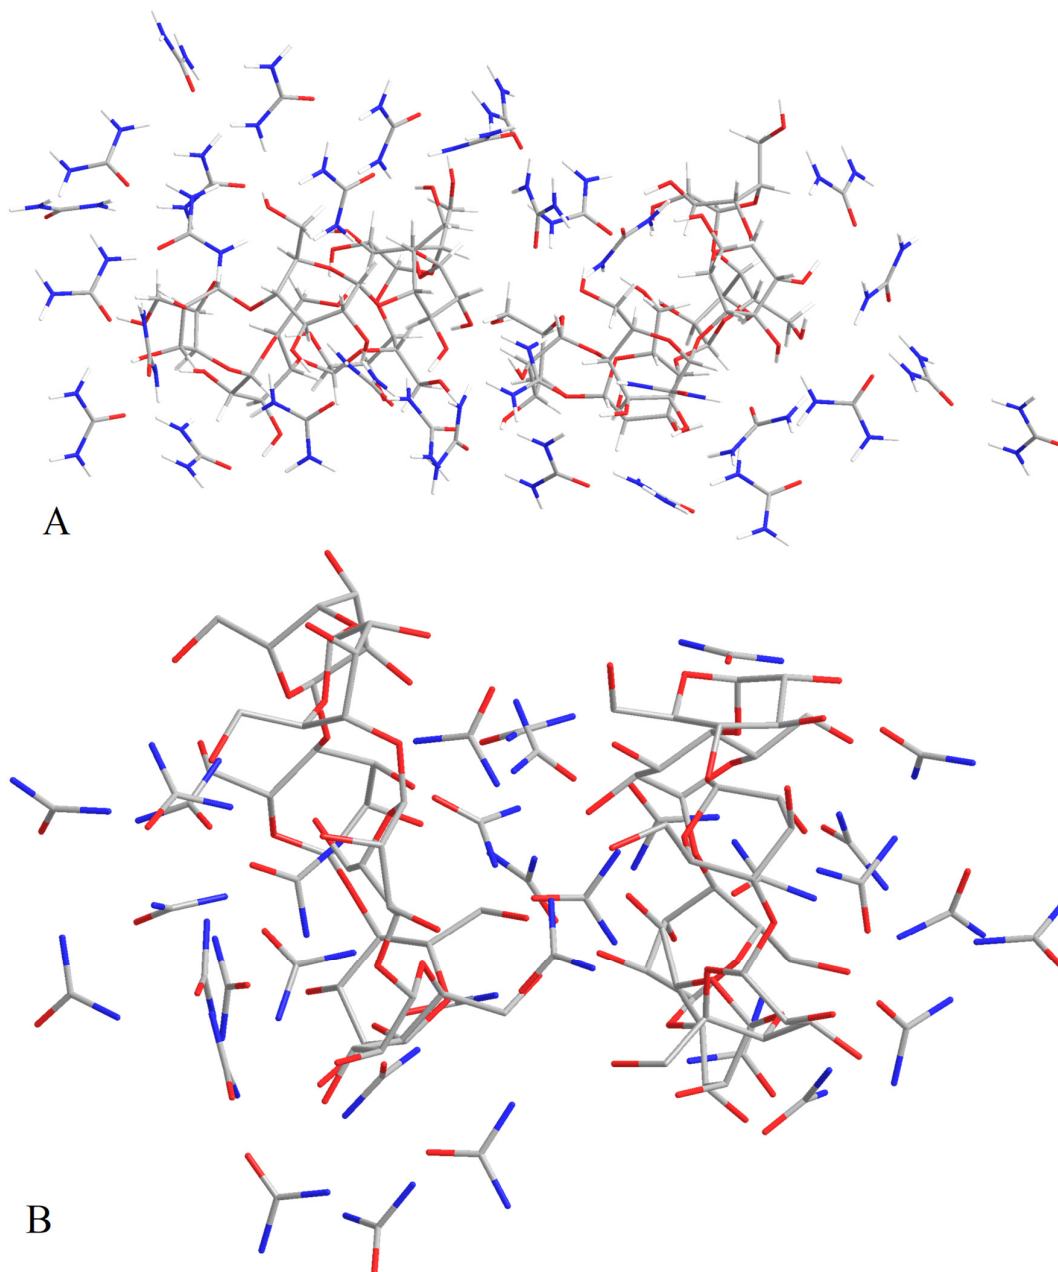

Figure S7. Calibration curve for annonacin in  $\text{CHCl}_3$ .

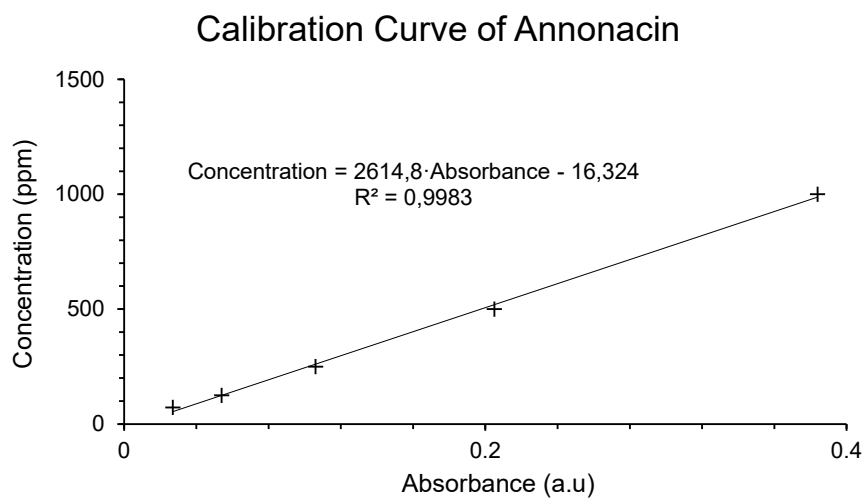

Figure S8. Critical micellar concentration experiment

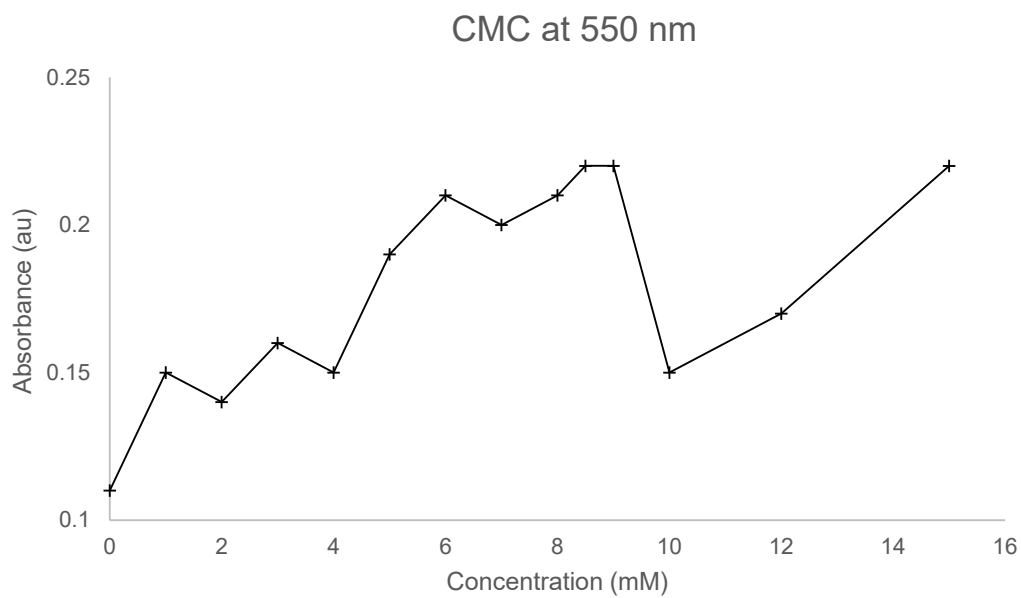



**Figure S9.** XRD experiment of (A)  $\alpha$ -cyclodextrin and (B) SMPMs-ACGs

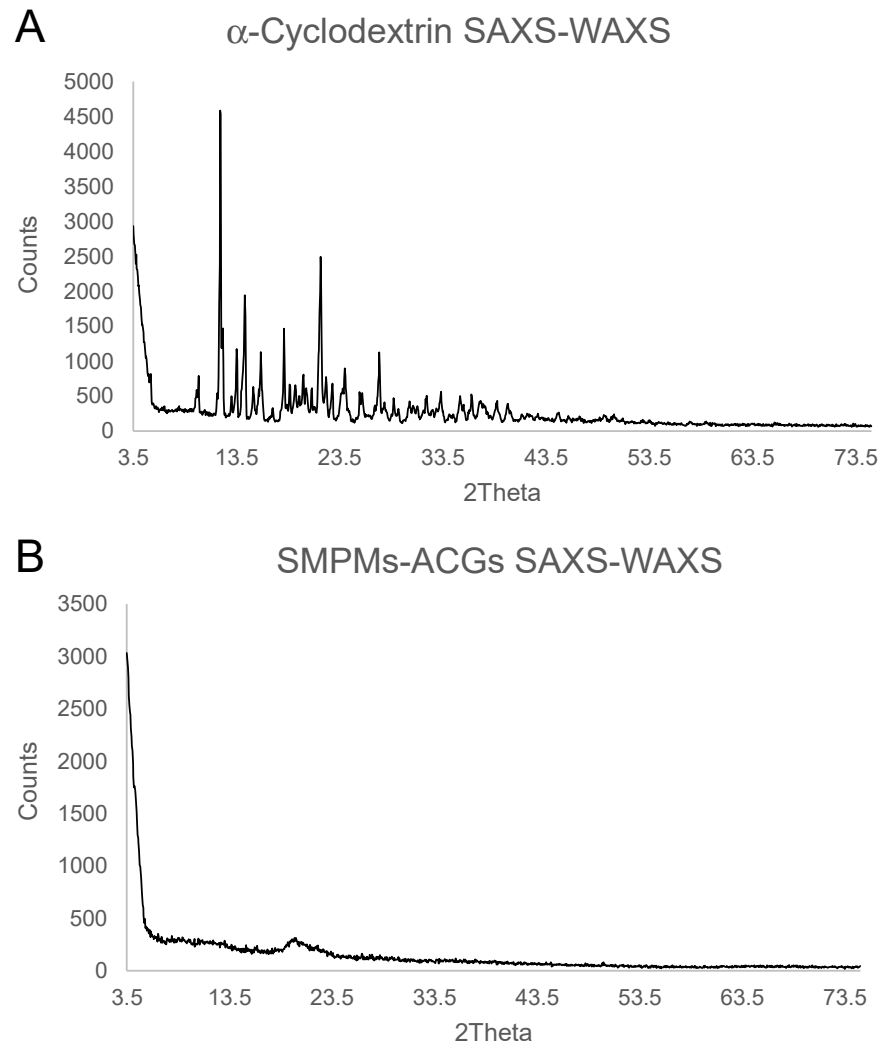

Supplement: molecules-25-04861-s001.pdf [file molecules-25-04861-s001.pdf]
